# Supplementary material
Source: publisher site journal article supplement (https://www.spandidos-publications.com/5394/downloadSupplementary)
Supplement: Supplementary file 1 [file downloadSupplementary]

|                                                                                                                                                                                                                           |   |   |   |   |   |   |   |   |   |   |   |   |   |   |
|---------------------------------------------------------------------------------------------------------------------------------------------------------------------------------------------------------------------------|---|---|---|---|---|---|---|---|---|---|---|---|---|---|
| ic criteria=Y<br>No description or<br>patient self-report=N                                                                                                                                                               |   |   |   |   |   |   |   |   |   |   |   |   |   |   |
| Documentation of<br>other treatment<br>modalities<br>Documentation=Y<br>No documentation=N                                                                                                                                | Y | Y | Y | Y | Y | Y | Y | Y | Y | Y | Y | N | Y | Y |
| Extent to which valid<br>outcomes are described<br>Adequate description<br>of outcome=Y<br>Insufficient detail<br>regarding outcome or<br>follow-up time=N                                                                | Y | Y | Y | Y | Y | Y | Y | Y | Y | Y | Y | Y | Y | Y |
| Prespecification of<br>harms, mode of harms<br>collection<br>Description of a list of<br>harms assessed or<br>monitoring=Y<br>No such description or<br>passive harms<br>collection=N<br>No adverse events<br>reported=NA | Y | N | Y | Y | Y | Y | Y | Y | Y | Y | Y | Y | Y | Y |
| Financial Conflict of<br>interest (COI)<br>Funding source<br>reported=Y<br>Funding source not<br>reported=N                                                                                                               | Y | Y | Y | Y | Y | N | Y | Y | Y | Y | Y | Y | N | Y |
